# Supplementary material for: Nano-Based Approved Pharmaceuticals for Cancer Treatment: Present and Future Challenges
Source: MDPI journal article supplement (doi:10.3390/biom12060784), 2022-06-04
Supplement: s1 [file s1]

**Supplementary Table S1.** Current active clinical trials using nanopharmaceuticals for cancer therapy in monotherapy or combined therapy.

| NCT Number  | Title                                                                                                                                                                                                               | Indication    | Intervention                                                                                                                                                                                                                                 | Phase | Start Date    | Refs. |
|-------------|---------------------------------------------------------------------------------------------------------------------------------------------------------------------------------------------------------------------|---------------|----------------------------------------------------------------------------------------------------------------------------------------------------------------------------------------------------------------------------------------------|-------|---------------|-------|
| NCT00662129 | Paclitaxel Albumin-Stabilized Nanoparticle Formulation, Gemcitabine, and Bevacizumab in Treating Patients with Metastatic Breast Cancer                                                                             | Breast Cancer | Biological: bevacizumab   Drug: gemcitabine hydrochloride   Drug: paclitaxel albumin-stabilized nanoparticle formulation                                                                                                                     | II    | November 2008 | 162   |
| NCT00110084 | ABI-007 (Nab-Paclitaxel) and Gemcitabine in Treating Women with Metastatic Breast Cancer                                                                                                                            | Breast Cancer | Drug: Gemcitabine   Drug: Paclitaxel protein-bound particles for injectable suspension (albumin-bound)                                                                                                                                       | II    | August 2005   | 163   |
| NCT00629499 | Nanoparticle Albumin-Bound (Nab) Paclitaxel/Cyclophosphamide in Early-Stage Breast Cancer                                                                                                                           | Breast Cancer | Drug: nab paclitaxel   Drug: Cyclophosphamide   Drug: Trastuzumab                                                                                                                                                                            | II    | April 2008    | 164   |
| NCT00856492 | S0800, Nab-Paclitaxel, Doxorubicin, Cyclophosphamide, and Pegfilgrastim with or Without Bevacizumab in Treating Women with Inflammatory or Locally Advanced Breast Cancer                                           | Breast Cancer | Biological: bevacizumab   Biological: pegfilgrastim   Drug: cyclophosphamide   Drug: doxorubicin hydrochloride   Drug: paclitaxel albumin-stabilized nanoparticle formulation                                                                | II    | April 2010    | 165   |
| NCT00553462 | Carboplatin and Paclitaxel Albumin-Stabilized Nanoparticle Formulation Followed by Radiation Therapy and Erlotinib in Treating Patients with Stage III Non-Small Cell Lung Cancer That Cannot Be Removed by Surgery | Lung Cancer   | Drug: carboplatin   Drug: erlotinib hydrochloride   Drug: paclitaxel albumin-stabilized nanoparticle formulation   Radiation: radiation therapy                                                                                              | II    | March 2008    | 166   |
| NCT00729612 | Paclitaxel Albumin-Stabilized Nanoparticle Formulation and Carboplatin in Treating Patients with Stage IIIB, Stage IV, or Recurrent Non-Small Cell Lung Cancer                                                      | Lung Cancer   | Drug: carboplatin   Drug: paclitaxel albumin-stabilized nanoparticle formulation   Genetic: protein expression analysis   Other: immunoenzyme technique   Other: immunohistochemistry staining method   Other: laboratory biomarker analysis | II    | August 2008   | 167   |
| NCT00675259 | Phase II NCT (Neoadjuvant Chemotherapy) w/ Weekly Abraxane in Combination with Carboplatin & Bevacizumab in Breast Cancer                                                                                           | Breast Cancer | Drug: bevacizumab   Drug: carboplatin   Drug: nab-paclitaxel   Procedure: Surgery   Drug: Adjuvant chemotherapy                                                                                                                              | II    | July 2008     | 168   |

|             |                                                                                                                                                                                                                                    |                                                                                                  |                                                                                                                                                                                                                                               |      |               |     |
|-------------|------------------------------------------------------------------------------------------------------------------------------------------------------------------------------------------------------------------------------------|--------------------------------------------------------------------------------------------------|-----------------------------------------------------------------------------------------------------------------------------------------------------------------------------------------------------------------------------------------------|------|---------------|-----|
| NCT01620190 | Paclitaxel Albumin-Stabilized Nanoparticle Formulation in Treating Patients with Previously Treated Advanced Non-small Cell Lung Cancer                                                                                            | Recurrent Non-Small Cell Lung Carcinoma, Stage IV Non-Small Cell Lung Cancer                     | Other: Laboratory Biomarker Analysis Drug: Paclitaxel Albumin-Stabilized Nanoparticle Formulation                                                                                                                                             | II   | December 2012 | 169 |
| NCT00691054 | Abraxane Therapy in Patients with Pancreatic Cancer Who Failed First-Line Gemcitabine Therapy                                                                                                                                      | Pancreatic Cancer                                                                                | Drug: Abraxane                                                                                                                                                                                                                                | II   | June 2008     | 170 |
| NCT00616967 | Carboplatin and Nab-Paclitaxel with or Without Vorinostat in Treating Women with Newly Diagnosed Operable Breast Cancer                                                                                                            | Breast Cancer                                                                                    | Drug: carboplatin Drug: paclitaxel albumin-stabilized nanoparticle formulation Drug: vorinostat Other: placebo                                                                                                                                | II   | May 2008      | 171 |
| NCT00407888 | Doxorubicin Hydrochloride, Cyclophosphamide, and Filgrastim Followed by Paclitaxel Albumin-Stabilized Nanoparticle Formulation with or Without Trastuzumab in Treating Patients with Breast Cancer Previously Treated with Surgery | Several breast cancers                                                                           | Drug: doxorubicin hydrochloride Drug: cyclophosphamide Biological: filgrastim Drug: paclitaxel albumin-stabilized nanoparticle formulation Biological: trastuzumab Other: laboratory biomarker analysis Procedure: quality-of-life assessment | II   | May 2006      | 172 |
| NCT00479674 | Phase II Study with Abraxane, Bevacizumab and Carboplatin in Triple Negative Metastatic Breast Cancer                                                                                                                              | Breast Cancer                                                                                    | Drug: Abraxane Drug: Bevacizumab Drug: Carboplatin                                                                                                                                                                                            | II   | May 2007      | 173 |
| NCT02009332 | Phase I/2 Study of ABI-009 in Nonmuscle Invasive Bladder Cancer                                                                                                                                                                    | Non-muscle Invasive Bladder Cancer (NMIBC)                                                       | Drug: ABI-009 Drug: Gemcitabine                                                                                                                                                                                                               | I/II | April 2014    | 174 |
| NCT00733408 | Nab-Paclitaxel and Bevacizumab Followed by Bevacizumab and Erlotinib in Metastatic Breast Cancer                                                                                                                                   | Several breast cancers                                                                           | Drug: paclitaxel albumin-stabilized nanoparticle formulation Biological: bevacizumab Drug: erlotinib hydrochloride                                                                                                                            | II   | April 2008    | 175 |
| NCT00466960 | Sargramostim and Paclitaxel Albumin-Stabilized Nanoparticle Formulation in Treating Patients with Advanced Ovarian Cancer, Fallopian Tube Cancer, or Primary Peritoneal Cancer That Did Not Respond to Previous Chemotherapy       | Brenner Tumor, Fallopian Tube Cancer, Peritoneal Cavity Cancer, many histological ovarian cancer | Biological: sargramostim Drug: paclitaxel albumin-stabilized nanoparticle formulation Other: laboratory biomarker analysis Other: immunologic technique                                                                                       | II   | May 2006      | -   |
| NCT00499252 | Paclitaxel Albumin-Stabilized Nanoparticle Formulation in Treating Patients with Recurrent or                                                                                                                                      | Fallopian Tube Carcinoma, Primary Peritoneal Carcinoma, Recurrent Ovarian Carcinoma              | Drug: Paclitaxel Albumin-Stabilized Nanoparticle Formulation                                                                                                                                                                                  | II   | June 2007     | 176 |

|             |                                                                                                                                                                |                                                                              |                                                                                                                                                          |         |                |     |
|-------------|----------------------------------------------------------------------------------------------------------------------------------------------------------------|------------------------------------------------------------------------------|----------------------------------------------------------------------------------------------------------------------------------------------------------|---------|----------------|-----|
|             | Persistent Ovarian Epithelial Cancer, Fallopian Tube Cancer, or Primary Peritoneal Cancer                                                                      |                                                                              |                                                                                                                                                          |         |                |     |
| NCT00785291 | Paclitaxel, Nab-paclitaxel, or Ixabepilone with or Without Bevacizumab in Treating Patients with Stage IIIC or Stage IV Breast Cancer                          | Several breast cancers                                                       | Biological: Bevacizumab Drug: Ixabepilone Other: Laboratory Biomarker Analysis Drug: Nab-paclitaxel Drug: Paclitaxel Other: Questionnaire Administration | III     | November 2008  | 177 |
| NCT03670030 | A Study to testABI-009 in Patients with Metastatic, Unresectable, Low or Intermediate Grade Neuroendocrine Tumors of the Lung or Gastroenteropancreatic System | Neuroendocrine Tumors                                                        | Drug: ABI-009                                                                                                                                            | II      | November 2018  | -   |
| NCT00093145 | Study of Albumin-bound Paclitaxel (Abraxane) in Combination with Carboplatin and Herceptin in Patients with Advanced Breast Cancer                             | Breast Cancer                                                                | Drug: Albumin-bound paclitaxel Drug: Carboplatin Drug: Herceptin®                                                                                        | II      | June 2004      | 178 |
| NCT00470548 | Abraxane and Alimta in Advanced Solid Tumors                                                                                                                   | Breast Cancer, Lung Cancer, Unspecified Adult Solid Tumor, Protocol Specific | Drug: Abraxane Drug: Alimta                                                                                                                              | I/II    | April 2007     | 179 |
| NCT01938833 | Romidepsin and Abraxane in Treating Patients with Metastatic Inflammatory Breast Cancer                                                                        | Several breast cancers                                                       | Drug: Romidepsin Drug: Abraxane                                                                                                                          | I/II    | April 2014     | 180 |
| NCT00544648 | Ph I/II Nab-Paclitaxel & Carboplatin w/Concurrent Radiation Therapy for Unresectable Stg III NSCLC                                                             | Lung Cancer                                                                  | Drug: carboplatin Drug: nab-paclitaxel Radiation: Radiation therapy                                                                                      | I/II    | November 2007  | 181 |
| NCT00748553 | A Phase I/II Clinical Trial of Vidaza with Abraxane in Patients with Advanced/Metastatic Solid Tumors and Breast Cancer                                        | Advanced or Metastatic Solid Tumors, Advanced or Metastatic Breast Cancer    | Drug: Azacitidine (Vidaza) Drug: Nab-paclitaxel (Abraxane)                                                                                               | I/II    | September 2008 | 182 |
| NCT01380769 | A phase II Study of CRLX101(NLG207) in Patients with Advanced Non-Small Cell Lung Cancer                                                                       | Non-Small Cell Lung Cancer                                                   | Drug: CRLX101 Other: Best Supportive Care                                                                                                                | II      | June 2011      | -   |
| NCT00331630 | Abraxane and Lapatinib in Treating Patients with Stage I, Stage II, or Stage III Breast Cancer                                                                 | Breast Cancer                                                                | Drug: lapatinib ditosylate Drug: paclitaxel albumin-stabilized nanoparticle formulation                                                                  | Early I | May 2006       | 183 |
| NCT00851877 | Nab-Paclitaxel, Cisplatin, and Cetuximab with Concurrent Radiation Therapy for Locally Advanced Head and Neck Cancer                                           | Head and Neck Cancer                                                         | Biological: Cetuximab Drug: Cisplatin Drug: Nab-Paclitaxel Radiation: intensity-modulated radiation therapy                                              | I/II    | March 2009     | 184 |

|             |                                                                                                                                                                                                                   |                                                                                      |                                                                                                                                                                                                        |     |               |     |
|-------------|-------------------------------------------------------------------------------------------------------------------------------------------------------------------------------------------------------------------|--------------------------------------------------------------------------------------|--------------------------------------------------------------------------------------------------------------------------------------------------------------------------------------------------------|-----|---------------|-----|
| NCT00709761 | Phase II Lapatinib Plus Nab-Paclitaxel as First and Second Line Therapy In her2+ MBC                                                                                                                              | Neoplasms, Breast                                                                    | Drug: Lapatinib/nab-Paclitaxel                                                                                                                                                                         | II  | July 2008     | 185 |
| NCT01644890 | A Phase III Study of NK105 in Patients with Breast Cancer                                                                                                                                                         | Breast Cancer Nos Metastatic Recurrent                                               | Drug: NK105 Drug: Paclitaxel                                                                                                                                                                           | III | July 2012     | 186 |
| NCT02562716 | S1505: Combination Chemotherapy or Gemcitabine Hydrochloride and Paclitaxel Albumin-Stabilized Nanoparticle Formulation Before Surgery in Treating Patients with Pancreatic Cancer That Can Be Removed by Surgery | Pancreatic Adenocarcinoma, Resectable<br>Pancreatic Carcinoma                        | Drug: Fluorouracil Drug: Gemcitabine Hydrochloride Drug: Irinotecan Hydrochloride Drug: Oxaliplatin Drug: Paclitaxel Albumin-Stabilized Nanoparticle Formulation Procedure: Pancreatectomy             | II  | January 2016  | 187 |
| NCT03120832 | Phase I Trial of PAN-301-1 (SNS-301) in Cancer Patients                                                                                                                                                           | Prostate Cancer                                                                      | Biological: PAN-301-1                                                                                                                                                                                  | I   | December 2016 | 188 |
| NCT01566435 | Induction Chemotherapy with ACF Followed by Chemoradiation Therapy for Adv. Head & Neck Cancer                                                                                                                    | Head and Neck Neoplasms                                                              | Drug: paclitaxel albumin-stabilized nanoparticle formulation Drug: Cisplatin Drug: Fluorouracil Radiation: Intensity modulated radiation therapy Drug: Cetuximab Procedure: Quality-of-life assessment | II  | August 2012   | 189 |
| NCT00821964 | Topical Imiquimod and Abraxane in Treating Patients with Advanced Breast Cancer                                                                                                                                   | Male Breast Cancer, Recurrent Breast Cancer, Skin Metastases, Stage IV Breast Cancer | Drug: imiquimod Drug: Abraxane Other: laboratory biomarker analysis Genetic: RNA analysis Other: immunoenzyme technique                                                                                | II  | December 2008 | 190 |
| NCT01207102 | Study Of Abraxane® And Carboplatin as First-Line Treatment for Triple Negative Metastatic Breast Cancer                                                                                                           | Metastatic Breast Cancer                                                             | Drug: Abraxane Drug: Carboplatin                                                                                                                                                                       | II  | August 2011   | 191 |
| NCT01921751 | High or Standard Intensity Radiation Therapy After Gemcitabine Hydrochloride and Nab-paclitaxel in Treating Patients with Pancreatic Cancer That Cannot Be Removed by Surgery                                     | Pancreatic Adenocarcinoma, Stage III<br>Pancreatic Cancer                            | Radiation: low intensity radiation therapy Drug: Capecitabine Drug: Gemcitabine Radiation: high intensity radiation therapy Drug: nab-Paclitaxel                                                       | II  | August 2013   | 192 |
| NCT03875092 | A Study of Carboplatin-                                                                                                                                                                                           | Non-small Cell Lung Cancer                                                           | Biological: Pembrolizumab Drug:                                                                                                                                                                        | III | April         | 193 |

|             |                                                                                                                                                                                                          |                                                                                                   |                                                                                                                                                                                                                                                              |      |                |     |
|-------------|----------------------------------------------------------------------------------------------------------------------------------------------------------------------------------------------------------|---------------------------------------------------------------------------------------------------|--------------------------------------------------------------------------------------------------------------------------------------------------------------------------------------------------------------------------------------------------------------|------|----------------|-----|
|             | Paclitaxel/Nab-Paclitaxel Chemotherapy with or Without Pembrolizumab (MK-3475) in Adults with First Line Metastatic Squamous Non-small Cell Lung Cancer (MK-3475-407/KEYNOTE-407)-China Extension Study  |                                                                                                   | Paclitaxel Drug: Nab-paclitaxel Drug: Carboplatin Drug: Saline placebo for pembrolizumab                                                                                                                                                                     |      | 2017           |     |
| NCT02775435 | A Study of Carboplatin-Paclitaxel/Nab-Paclitaxel Chemotherapy with or Without Pembrolizumab (MK-3475) in Adults with First Line Metastatic Squamous Non-small Cell Lung Cancer (MK-3475-407/KEYNOTE-407) | Non-small Cell Lung Cancer                                                                        | Biological: Pembrolizumab Drug: Paclitaxel Drug: Nab-paclitaxel Drug: Carboplatin Drug: Saline placebo for pembrolizumab                                                                                                                                     | III  | June 2016      | 194 |
| NCT02608229 | BVD-523 Plus Nab-paclitaxel and Gemcitabine in Patients with Metastatic Pancreatic Cancer                                                                                                                | Pancreatic Cancer, Cancer of Pancreas, Cancer of the Pancreas, Pancreas Cancer                    | Drug: BVD-523 Drug: Nab-paclitaxel Drug: Gemcitabine Procedure: Tumor biopsy                                                                                                                                                                                 | I    | June 2016      | 195 |
| NCT02258659 | Nab-paclitaxel and Carboplatin Followed by Response-Based Local Therapy in Treating Patients with Stage III or IV HPV-Related Oropharyngeal Cancer                                                       | Human Papilloma Virus Infection, Stage III, IVA and IVB Squamous Cell Carcinoma of the Oropharynx | Drug: paclitaxel albumin-stabilized nanoparticle formulation Drug: carboplatin Radiation: radiation therapy Drug: paclitaxel Drug: fluorouracil Drug: hydroxyurea Drug: cisplatin Other: laboratory biomarker analysis Procedure: quality-of-life assessment | II   | September 2014 | 196 |
| NCT01746225 | Schedules of Nab-Paclitaxel in Metastatic Breast Cancer                                                                                                                                                  | Metastatic Breastcancer                                                                           | Drug: nab-Paclitaxel                                                                                                                                                                                                                                         | II   | April 2013     | 197 |
| NCT00309959 | ABI-007 in Treating Patients with Persistent or Recurrent Cervical Cancer                                                                                                                                | Many histological cervical cancers                                                                | Drug: Paclitaxel Albumin-Stabilized Nanoparticle Formulation Other: Laboratory Biomarker Analysis                                                                                                                                                            | II   | November 2006  | 198 |
| NCT03101358 | Study of Topical SOR007 Ointment for Cutaneous Metastases                                                                                                                                                | Cutaneous Metastasis                                                                              | Drug: SOR007 (Uncoated Nanoparticle Paclitaxel) Ointment                                                                                                                                                                                                     | I/II | January 2018   | 199 |
| NCT01646762 | Paclitaxel Albumin-Stabilized Nanoparticle Formulation in Treating Patients with Relapsed or Refractory Multiple Myeloma                                                                                 | Refractory Plasma Cell Myeloma                                                                    | Drug: Paclitaxel Albumin-Stabilized Nanoparticle Formulation Other: Laboratory Biomarker Analysis                                                                                                                                                            | II   | November 2012  | 200 |
| NCT02010567 | Neoadjuvant Chemoradiotherapy With CRLX-101 and Capecitabine for Rectal Cancer                                                                                                                           | Rectal Cancer                                                                                     | Drug: CRLX101 Drug: Capecitabine Radiation: Radiotherapy Procedure: Surgery                                                                                                                                                                                  | I/II | December 2013  | 201 |

|             |                                                                                                                                                                                                                |                                                              |                                                                                                                                                                                                                                       |      |              |     |
|-------------|----------------------------------------------------------------------------------------------------------------------------------------------------------------------------------------------------------------|--------------------------------------------------------------|---------------------------------------------------------------------------------------------------------------------------------------------------------------------------------------------------------------------------------------|------|--------------|-----|
| NCT00254592 | Neoadjuvant Treatment of Breast Cancer                                                                                                                                                                         | Breast Cancer                                                | Drug: Doxorubicin Drug: Cyclophosphamide Drug: Carboplatin Drug: Nab-paclitaxel Drug: GM-CSF Drug: Trastuzumab Drug: Bevacizumab                                                                                                      | II   | October 2005 | 202 |
| NCT00626405 | Bevacizumab and Temozolomide or Bevacizumab and Paclitaxel Albumin-Stabilized Nanoparticle Formulation and Carboplatin in Treating Patients with Stage IV Malignant Melanoma That Cannot Be Removed by Surgery | Melanoma (Skin)                                              | Biological: bevacizumab Drug: carboplatin Drug: paclitaxel albumin-stabilized nanoparticle formulation Drug: temozolomide                                                                                                             | II   | August 2008  | 203 |
| NCT02427841 | Nab-paclitaxel and Gemcitabine Hydrochloride Followed by Radiation Therapy Before Surgery in Treating Patients with Pancreatic Cancer That Can Be Removed by Surgery                                           | Pancreatic Adenocarcinoma, Resectable Pancreatic Carcinoma   | Drug: Fluorouracil Drug: Gemcitabine Radiation: Image Guided Radiation Therapy Radiation: Intensity-Modulated Radiation Therapy Other: Laboratory Biomarker Analysis Drug: Nab-paclitaxel Procedure: Therapeutic Conventional Surgery | II   | January 2016 | -   |
| NCT00738361 | Paclitaxel Albumin-Stabilized Nanoparticle Formulation in Treating Patients with Metastatic Melanoma of the Eye That Cannot Be Removed by Surgery                                                              | Intraocular Melanoma                                         | Drug: nab-paclitaxel                                                                                                                                                                                                                  | II   | August 2008  | 204 |
| NCT00404235 | Carboplatin and ABI-007 in Treating Patients with Stage IV Melanoma That Cannot Be Removed by Surgery                                                                                                          | Melanoma (Skin)                                              | Drug: carboplatin Drug: paclitaxel albumin-stabilized nanoparticle formulation                                                                                                                                                        | II   | October 2006 | 205 |
| NCT02314052 | Phase Ib/2, Multicenter, Dose Escalation Study of DCR-MYC in Patients with Hepatocellular Carcinoma                                                                                                            | Hepatocellular Carcinoma                                     | Drug: DCR-MYC                                                                                                                                                                                                                         | I/II | January 2015 | -   |
| NCT02626520 | Phase II Evaluation of Multi-modality Algorithm for Non-metastatic Adenocarcinoma of Pancreas or Ampulla                                                                                                       | Ductal Adenocarcinoma of Pancreas, Adenocarcinoma of Ampulla | Drug: Gemcitabine and nanoparticle albumin bound paclitaxel Drug: 5-fluorouracil and irinotecan Radiation: Preoperative chemoradiation Procedure: Definitive resection                                                                | II   | May 2016     | 206 |

|             |                                                                                                                                                                         |                                      |                                                                                                                                                        |                |               |     |
|-------------|-------------------------------------------------------------------------------------------------------------------------------------------------------------------------|--------------------------------------|--------------------------------------------------------------------------------------------------------------------------------------------------------|----------------|---------------|-----|
| NCT02340156 | Phase II Study of Combined Temozolomide and SGT-53 for Treatment of Recurrent Glioblastoma                                                                              | RECURRENT GLIOBLASTOMA               | Genetic: SGT-53 Drug: Temozolomide                                                                                                                     | II             | December 2014 | -   |
| NCT02158520 | Nab-Paclitaxel and Bevacizumab or Ipilimumab as First-Line Therapy in Treating Patients with Stage IV Melanoma That Cannot Be Removed by Surgery                        | Melanomas                            | Biological: Bevacizumab Biological: Ipilimumab Other: Laboratory Biomarker Analysis Drug: Nab-paclitaxel Other: Pharmacological Study                  | II             | October 2013  | 207 |
| NCT04240639 | An Extension Study MRI/US Fusion Imaging and Biopsy in Combination with Nanoparticle Directed Focal Therapy for Ablation of Prostate Tissue                             | Neoplasms of the Prostate            | AuroShell particle infusion                                                                                                                            | Not Applicable | January 2020  | 208 |
| NCT04138342 | Topical Fluorescent Nanoparticles Conjugated Somatostatin Analog for Suppression and Bioimaging Breast Cancer                                                           | Breast Cancer<br>Skin Cancer         | Drug: Quantum dots coated with veldoreotide                                                                                                            | I              | December 2022 | 209 |
| NCT04789486 | Nano-SMART: Nanoparticles With MR Guided SBRT in Centrally Located Lung Tumors and Pancreatic Cancer                                                                    | Lung Cancer<br>Pancreatic Cancer     | Drug: AGuIX<br>Injected gadolinium-based nanoparticles<br>Radiation: Radiotherapy<br>Stereotactic magnetic resonance-guided adaptive radiation therapy | I              | May 2021      | -   |
| NCT05010759 | Study of Focal Ablation of the Prostate With NanoTherm® Therapy System for Intermediate-Risk Prostate Cancer                                                            | Prostate Cancer                      | Device: NanoTherm Ablation                                                                                                                             | Not Applicable | November 2021 | -   |
| NCT05359783 | Sentinel Node Localization and Staging With Low Dose Superparamagnetic Iron Oxide (MAGSNOW)                                                                             | Breast Cancer<br>Sentinel Lymph Node | Drug: Superparamagnetic Iron Oxide                                                                                                                     | I/II           | November 2021 | 210 |
| NCT04316091 | A Phase I Clinical Trial of Neoadjuvant Chemotherapy With/Without Superparamagnetic Iron Oxide Nanoparticles and Spinning Magnetic Field for Patients With Osteosarcoma | Osteosarcoma                         | Drug: neoadjuvant chemotherapy+SPIONs/SMF<br>Intratumoral injection of SPIONs, followed by SMF, combined with conventional neoadjuvant chemotherapy    | I              | August 2021   | -   |
